# Supplementary material
Source: Springer Nature journal article supplement (https://www.springermedizin.de/resource/supplementary/12891_2013_1945_MOESM2_ESM.pdf/9508860)

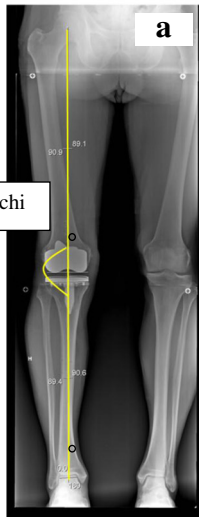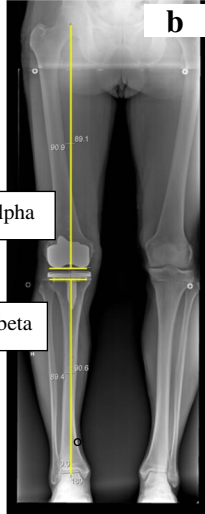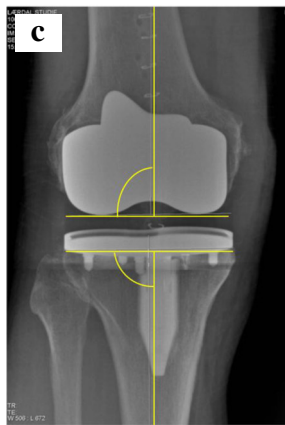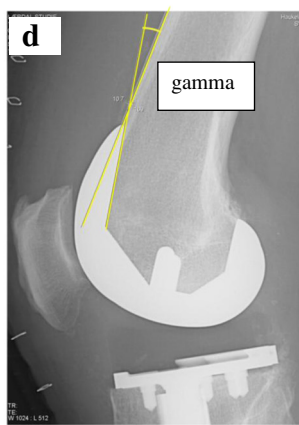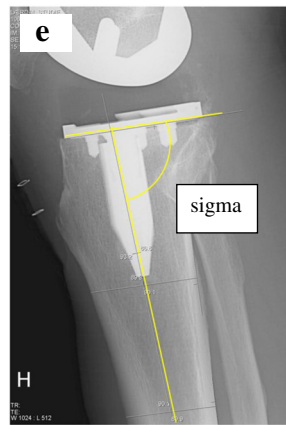

Supplement: MOESM2 [file 9508860]
